# Supplementary material for: Pathway-specific population attributable fractions
Source: bioRxiv or medRxiv preprint supplement (doi:10.1101/2020.10.15.20212845), 2021-03-19
Supplement: Supplementary file [file media-1.pdf]

# Pathway specific-population attributable fractions

## Supplementary information

### Identification of PS-PAF under conditions 1 and 2.

The following is a proof of the identifiability formula for path-specific attributable fractions, using assumptions 1. and 2. detailed in the main manuscript. In the following and subsequent derivations, we assume that covariates,  $C$  and mediators  $M^1, \dots, M^K$  have discrete distributions. The general cases of mixed discrete and continuous random variables with a well defined joint distribution follows similarly by replacing summations with integrals over general probability measures.

$$\begin{aligned} & P(Y_{A, G_{0|C}^j} = 1) \\ &= \sum_{c, a, m^j} P(Y_{a, G_{0|C}^j} = 1 | A = a, C = c, G_{0|C}^j = m^j) P(C = c) P(A = a | C = c) P(G_{0|C}^j = m^j | C = c, A = a) \\ &= \sum_{c, a, m^j} P(Y_{a, m^j} = 1 | A = a, C = c, G_{0|C}^j = m^j) P(C = c) P(A = a | C = c) P(M_0^j = m^j | C = c) \\ &= \sum_{c, a, m^j} P(Y_{a, m^j} = 1 | A = a, C = c) P(C = c) P(A = a | C = c) P(M_0^j = m^j | C = c) \end{aligned}$$

$$\begin{aligned}
&= \sum_{c,a,m^j} P(Y_{a,m^j} = 1|A = a, C = c)P(C = c)P(A = a|C = c)P(M_0^j = m^j|A = 0, C = c) \\
&= \sum_{c,a,m^j} P(Y_{a,m^j} = 1|A = a, C = c, M = m^j)P(C = c)P(A = a|C = c)P(M_0^j = m^j|A = 0, C = c) \\
&= \sum_{c,a,m^j} P(Y = 1|A = a, C = c, M = m^j)P(C = c)P(A = a|C = c)P(M = m^j|A = 0, C = c) \\
&= E_{A,C}(E_{M^j|A=0,C}(P(Y = 1|A, C, M^j)))
\end{aligned}$$

The first equality follows from the double expectation theorem. The second equality follows from the definition of  $G_{0|C}^j$  (which is generated from the distribution of  $M_0^j$  conditional on C, independently of A) and the 3rd equality since conditional on A and C,  $G_{0|C}^j$  is independent of  $Y_{a,m^j}$ . The fourth equality follows as  $M_0^j \perp\!\!\!\perp A|C$ . The fifth equality follows since  $Y_{a,m} \perp\!\!\!\perp M|A, C$ . The sixth equality follows by consistency.

#### Identification of mechanistic PS-PAF under conditions 1, 2 and 4.

$$\begin{aligned}
&P(Y_{A,M_0^j} = 1) \\
&= \sum_{c,a,m^j} P(Y_{a,M_0^j} = 1|A = a, C = c, M_0^j = m^j)P(C = c)P(A = a|C = c)P(M_0^j = m^j|A = a, C = c) \\
&= \sum_{c,a,m^j} P(Y_{a,m^j} = 1|A = a, C = c, M_0^j = m^j)P(C = c)P(A = a|C = c)P(M_0^j = m^j|A = a, C = c) \\
&= \sum_{c,a,m^j} P(Y_{a,m^j} = 1|A = a, C = c)P(C = c)P(A = a|C = c)P(M_0^j = m^j|A = a, C = c) \\
&= \sum_{c,a,m^j} P(Y_{a,m^j} = 1|A = a, C = c)P(C = c)P(A = a|C = c)P(M_0^j = m^j|A = 0, C = c) \\
&= \sum_{c,a,m^j} P(Y_{a,m^j} = 1|A = a, C = c, M = m^j)P(C = c)P(A = a|C = c)P(M_0^j = m^j|A = 0, C = c)
\end{aligned}$$

$$\begin{aligned}
&= \sum_{c,a,m^j} P(Y = 1|A = a, C = c, M = m^j)P(C = c)P(A = a|C = c)P(M = m^j|A = 0, C = c) \\
&= E_{A,C}(E_{M^j|A=0,C}(P(Y = 1|A, C, M^j)))
\end{aligned}$$

Here the proof is almost the same the proof of the path specific PAF. The main difference is the cross world assumption independence assumption:  $Y_{a,m^j} \perp\!\!\!\perp M_0^j|A = a, C$  is needed to reduce  $P(Y_{a,m^j} = 1|A = a, C = c, M_0^j = m^j)$  to  $P(Y_{a,m^j} = 1|A = a, C = c)$  in the third equality. In contrast, in the previous argument, the equality  $P(Y_{a,m^j} = 1|A = a, C = c, G_{0|C}^j = m^j) = P(Y_{a,m^j} = 1|A = a, C = c)$ , follows since  $G_{0|C}^j$  is randomly generated conditional on  $C$  and as a result is independent of  $Y_{a,m^j}$  conditional on  $A$  and  $C$ .

### Identification of $PAF_{A \rightarrow Y}$ under condition 3.

$$\begin{aligned}
&P(Y_{0,M^1,\dots,M^K} = 1) \\
&= \sum_{c,m^1,\dots,m^K} P(Y_{0,M^1,\dots,M^K} = 1|C = c, M^1 = m^1, \dots, M^K = m^K)P(C = c)P(M^1 = m^1, \dots, M^K = m^K|C = c) \\
&= \sum_{c,m^1,\dots,m^K} P(Y_{0,M^1,\dots,M^K} = 1|C = c, M^1 = m^1, \dots, M^K = m^K, A = 0)P(C = c)P(M^1 = m^1, \dots, |C = c) \\
&= \sum_{c,m^1,\dots,m^K} P(Y = 1|C = c, M^1 = m^1, \dots, M^K = m^K, A = 0)P(C = c)P(M^1 = m^1, \dots, M^K = m^K|C = c) \\
&= E_{C,M^1,\dots,M^K}(P(Y = 1|A = 0, C, M^1, \dots, M^K))
\end{aligned}$$

The first equality follows from iterated expectation theorem. Here the 3rd identifiability condition:  $(Y_{0,M^1,\dots,M^K} \perp\!\!\!\perp A|M^1, \dots, M^K)$  is used to show  $P(Y_{0,M^1,\dots,M^K} = 1|C = c, M^1 = m^1, \dots, M^K = m^K) = P(Y_{0,M^1,\dots,M^K} = 1|C = c, M^1 = m^1, \dots, M^K = m^K, A = 0)$  in the second equality. The final equality follows from consistency.

### Non parametric structural equations and the validity of the cross world assumption

Under the assumption that the joint distribution of  $(C, A, M, Y)$  follows a non-parametric structural model, the cross world condition:  $Y_{a,m} \perp\!\!\!\perp M_0|A =$

$a, C$  is satisfied. For simplicity of notation, we describe a one mediator situation in what follows; a similar argument can be used to demonstrate the same result when there are  $K > 1$  mediators. Effectively the non-parametric structural equations model implies the joint distribution is generated sequentially from unknown deterministic functions  $F_C, F_A, F_M, F_Y$  as follows:

$$C = F_C(U_C)$$

$$A = F_A(C, U_A)$$

$$M = F_M(C, A, U_M)$$

$$Y = F_Y(C, A, M, U_Y)$$

where,  $U_C, U_A, U_M$  and  $U_Y$  are independent noise random variables that add stochasticity to the joint distribution. Potential outcomes can be easily derived using the above equations. For instance, conditioning on  $A=a$  and  $C$ ,

$M_0 = F_M(C, 0, U_M)$  is a function of  $U_M$ , since  $C = F_C(U_C)$  is conditioned on. Also  $Y_{a,m} = F_Y(C, a, m, U_Y)$  is a function of  $U_Y$ , again since  $C$  is conditioned on. Since  $U_M$  and  $U_Y$  are independent,  $Y_{a,m} \perp\!\!\!\perp M_0 | A = a, C$

## References

- [1] A. Sjölander, “Mediation analysis with attributable fractions,” *Epidemiologic Methods*, vol. 7, no. 1, 2018.
